# Supplementary material for: Functionalization of unzipped carbon nanotube via in situ polymerization for mechanical reinforcement of polymer
Source: Royal Society of Chemistry journal article supplement (doi:10.1039/c2jm32124f), 2012-01-01
Supplement: c2jm32124f.pdf [file c2jm32124f.pdf]

# Functionalization of Unzipped Carbon Nanotube via in situ Polymerization for Mechanical Reinforcement of Polymer

*Jialiang Wang, Zixing Shi,\* Yu Ge, Yan Wang, Jinchen Fan and Jie Yin*

School of Chemistry & Chemical Technology, State Key Laboratory for Metal Matrix Composite Materials, Shanghai Jiao Tong University, Shanghai 200240, People's Republic of China.

\*Corresponding author: Tel: +86-21-54743268; Fax: +86-21-54747445; E-mail: zxshi@sjtu.edu.cn

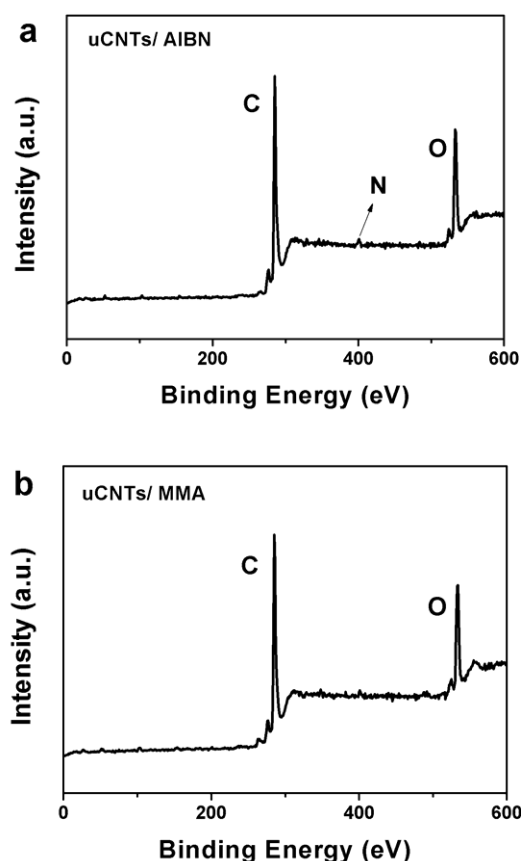

**Figure S1.** XPS spectra of (a) uCNTs/AIBN and (b) uCNTs/MMA. (Samples were heated in DMF for 24 h)

**Table S1.** Elemental composition of uCNTs and uCNTs based samples.

|              | <b>uCNTs</b> | <b>t-uCNTs</b> | <b>uCNTs-P</b> | <b>uCNTs/AIBN</b> | <b>uCNTs/MMA</b> |
|--------------|--------------|----------------|----------------|-------------------|------------------|
| <b>C (%)</b> | 74.50        | 81.49          | 74.88          | 80.72             | 81.29            |
| <b>O (%)</b> | 25.50        | 18.51          | 24.47          | 17.48             | 18.71            |
| <b>N (%)</b> | 0            | 0              | 0.65           | 1.80              | 0                |
| <b>C/O</b>   | 2.92         | 4.40           | 3.06           | 4.62              | 4.34             |

**Table S2.** Number-average molecular weight ( $M_n$ ) and polydispersity index (PDI) of free PMMA.

| <b>Sample</b>  | <b><math>M_n</math> (g/mol)</b> | <b>PDI</b> |
|----------------|---------------------------------|------------|
| <b>uCNT-P1</b> | 27190                           | 1.66       |
| <b>uCNT-P2</b> | 41030                           | 1.67       |
| <b>uCNT-P3</b> | 43680                           | 1.74       |
| <b>uCNT-P4</b> | 29940                           | 1.75       |
